# Supplementary material for: Pressure stabilization effect on the donor–acceptor polyiodide chains in tetraethylammonium bis(diiodine) triiodide – insights from Raman spectroscopy
Source: Royal Society of Chemistry journal article supplement (doi:10.1039/d4dt00268g), 2024-01-01
Supplement: d4dt00268g2.pdf [file d4dt00268g2.pdf]

# Supplementary Material

## Pressure stabilization effect on the donor-acceptor polyiodide chains in tetraethylammonium bis(diodine) triiodide – insights from Raman spectroscopy

Tomasz Poręba<sup>a\*</sup>, Piero Macchi<sup>b</sup>, Nicola Casati<sup>c</sup> and Tomasz Sierański<sup>d</sup>

<sup>a</sup> Laboratory for Quantum Magnetism, Institute of Physics, École Polytechnique Federale de Lausanne, Lausanne CH-1015, Switzerland

<sup>b</sup> Department of Chemistry, Materials and Chemical Engineering, Polytechnics of Milan. Via Mancinelli 7, 20131, Milan, Italy

<sup>c</sup> Swiss Light Source, Paul Scherrer Institute. CH-5232 Villigen PSI, Switzerland

<sup>d</sup> Institute of General and Ecological Chemistry, Lodz University of Technology, Zeromskiego 116, 90 - 924 Lodz, Poland

\*Corresponding author: tomasz.poreba@esrf.fr

### 1. Raman spectroscopy details on TEAI

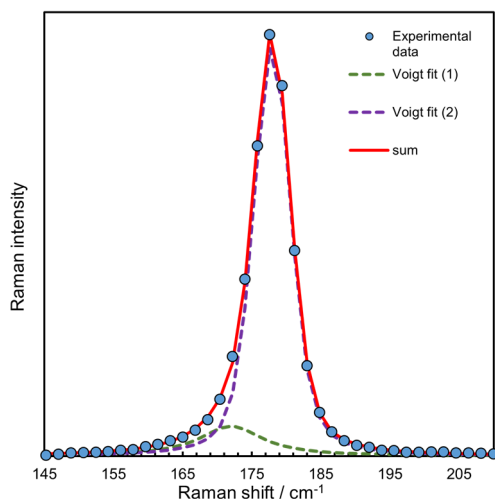

**Figure S1.** Experimental  $\nu(I_2)$  peak profile in TEAI deconvoluted with two Voigt functions centred at 171 and 178 cm<sup>-1</sup>, respectively.

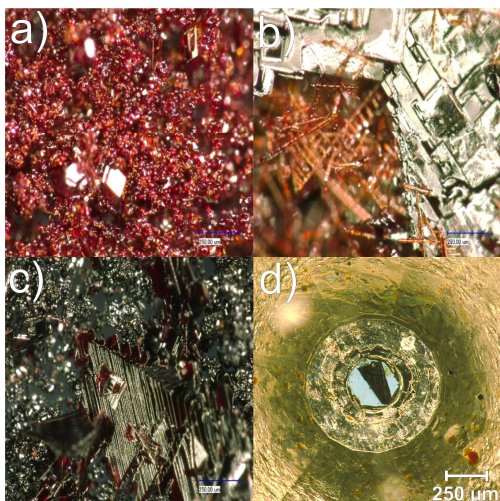

**Figure S2.** Sample microphotographs: a)  $\text{Et}_4\text{Ni}_3$ , b) mixture of  $\text{Et}_4\text{Ni}_3$  polymorphs at TEAI, c) pristine TEAI, d) TEAI crystal loaded in DAC

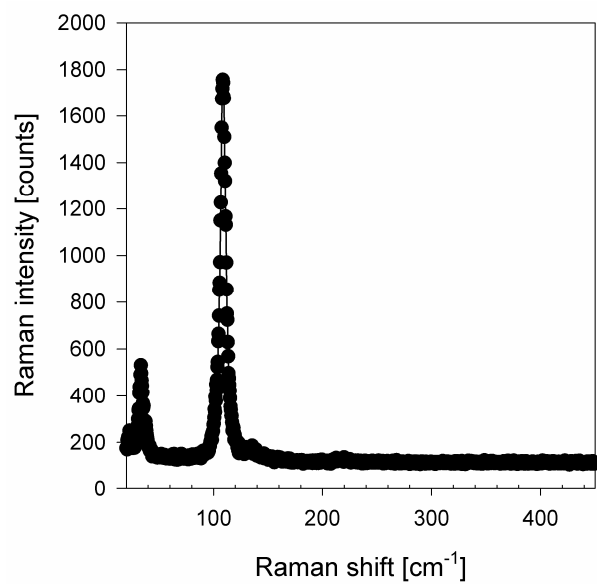

**Figure S3.** Raman spectrum of TEAI crystal collected in air (10mW, 10s, 532 nm) presents immediate decomposition to  $\text{Et}_4\text{Ni}_3$

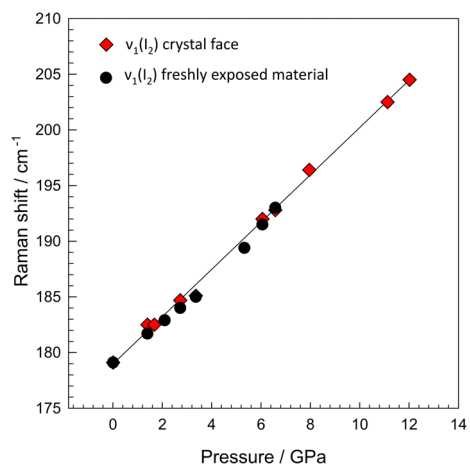

**Figure S4.** Pressure-shift of  $\nu_1(I_2)$  mode in TEAl observed from a region on a surface (diamond) and freshly exposed crystal interior (circles)

**Table S1:** Bond lengths for the studied systems at their energetic minima.

| System      | Bondlength (Å) | Angle (°) |
|-------------|----------------|-----------|
| $I_3^-$     | 2.933          | 180.00    |
| $I_2-I_3^-$ | 3.030 (inner)  | 109.20    |
|             | 2.827 (outer)  |           |

**Table S2:** Raman data (frequency and activity) for studied compounds for which an energetic minimum has been found.

| System                    | Frequency [ $\text{cm}^{-1}$ ] (activity) |                |                   |
|---------------------------|-------------------------------------------|----------------|-------------------|
|                           | Bending                                   | Assym. Stretch | Symmetric Stretch |
| $\text{I}_3^-$            | 58.66 (0)                                 | 115.92 (46.6)  | 145.42 (0)        |
| $\text{I}_2\text{-I}_3^-$ | -                                         | 144.37 (50.2)  | 160.26 (149.4)    |

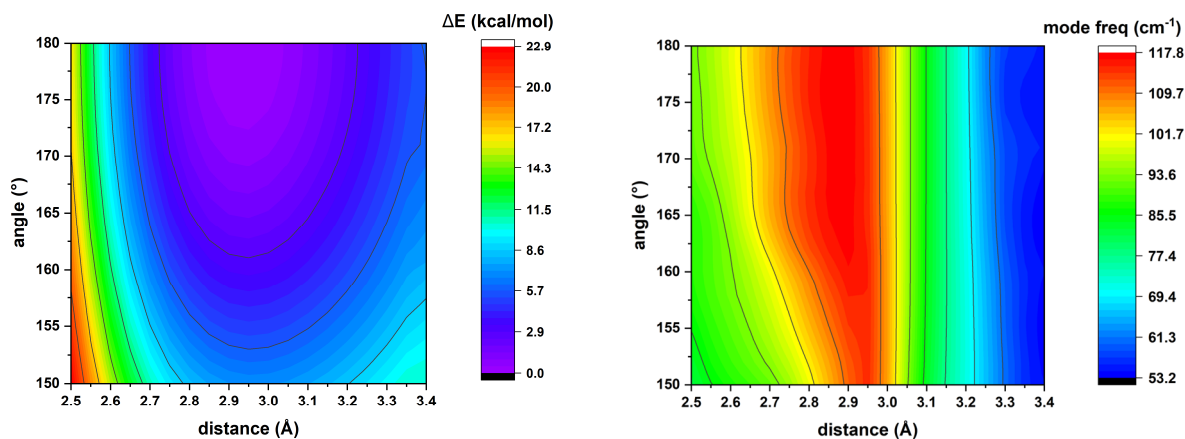

**Figure S5.** Potential energy surfaces calculated for triiodide fragment with different geometries are shown (left) along with the calculated Raman shifts (right), for the corresponding geometries, of I-I stretch for triiodide ( $\text{I}_2\cdots\text{I}$ )

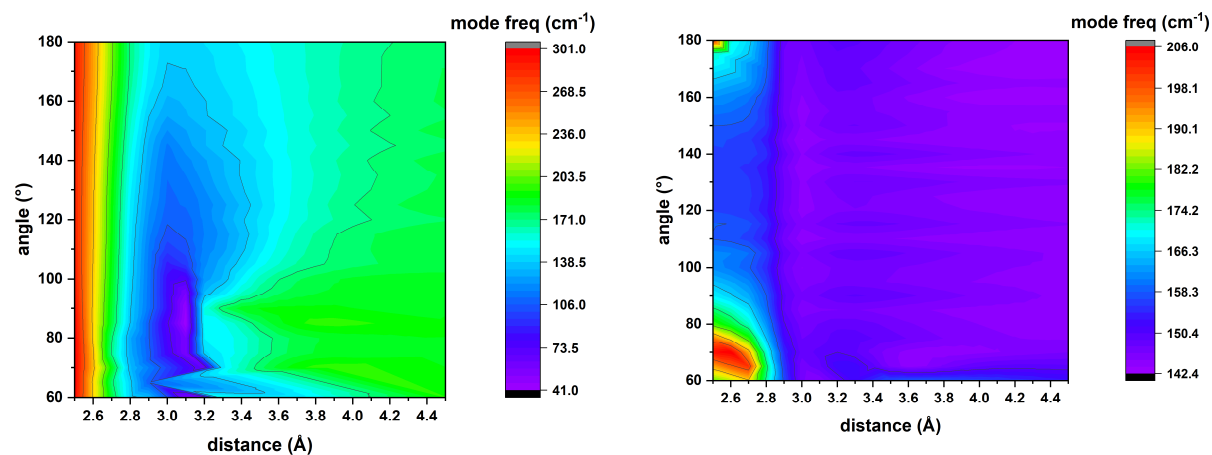

**Figure S6.** Asymmetric stretch,  $\nu_2(\text{I}_3^-)$  (left) and  $\nu_2(\text{I}_5^-)$  (right), mode frequencies calculated for various geometries

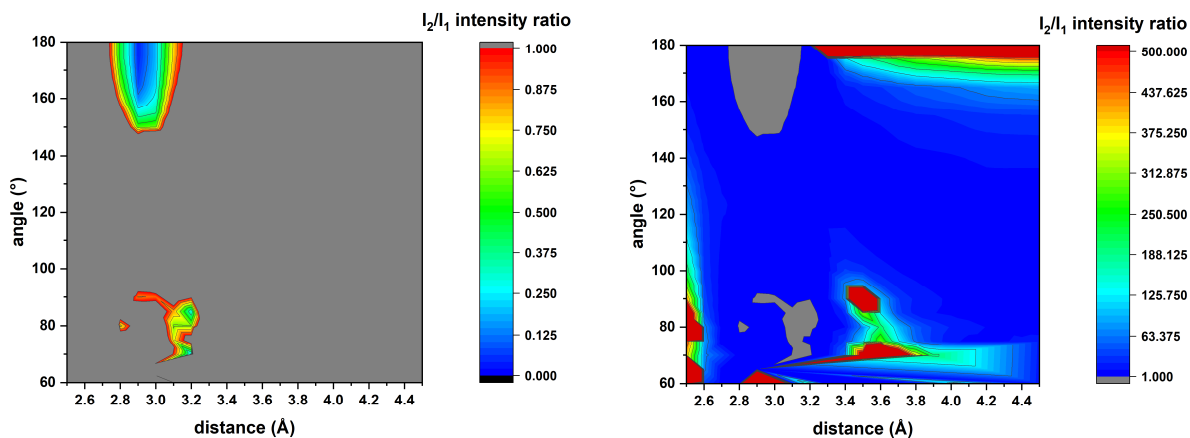

**Figure S7.**  $v_2/v_1$  ( $\sigma_u$ ,  $\sim 140\text{ cm}^{-1}$  and  $\sigma_g$ ,  $\sim 102\text{ cm}^{-1}$ ) modes intensity ratios calculated for various  $I_3^-$  geometries: below (left) and above (right) 1.

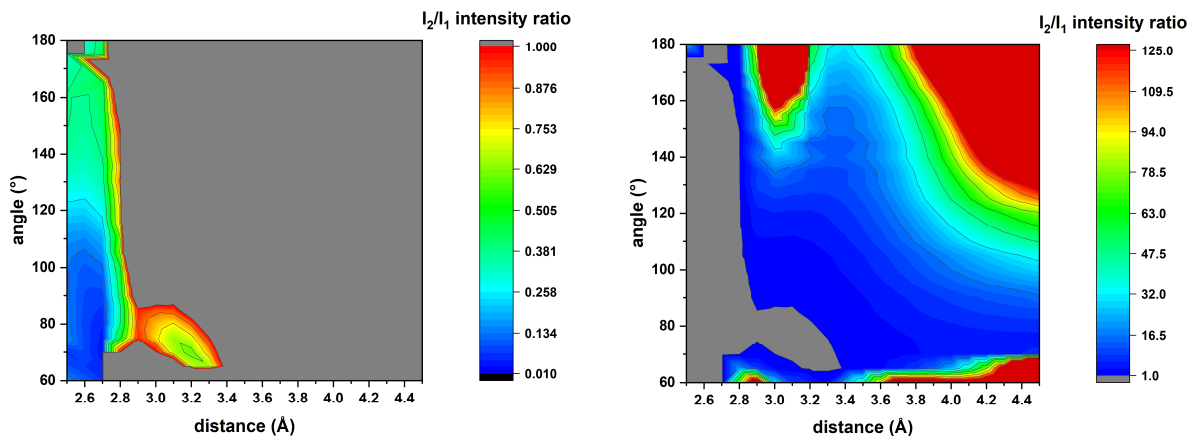

**Figure S8.**  $v_2$  (symmetric outer stretch)/ $v_1$  (asymmetric outer stretch) [ $\sigma_g$ ,  $\sim 165\text{ cm}^{-1}$  and  $\sigma_u$ ,  $\sim 144\text{ cm}^{-1}$ ] modes intensity ratios calculated for various  $I_3^-$  geometries: below (left) and above (right) 1.

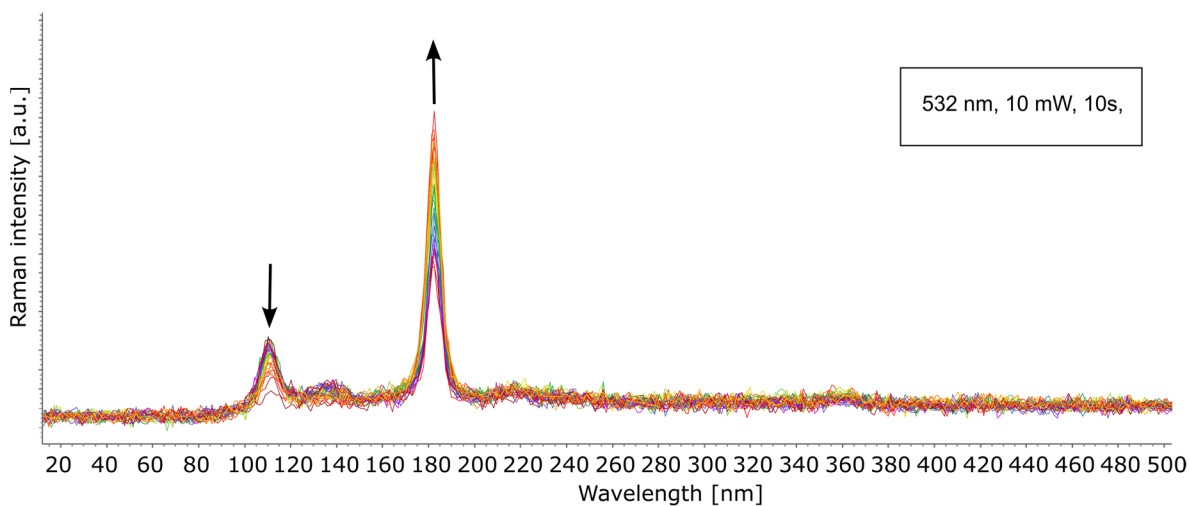

**Figure S9.** Linear decay of  $v_1(I_2)$  and emergence of  $v_1(I_3)$  in TEAL upon continuous 532 nm laser irradiation kept in air.

## 2. Experimental structures containing donor-acceptor polyiodides

**Table S3.** Experimental I-I distances and the respective Raman shifts extracted from literature. Only structures containing V - or L-shaped I<sub>2</sub>·I<sub>3</sub> fragments were considered.

| Compound                                                                                                         | I-I bond length<br>in I <sub>2</sub> [Å] | Raman shift<br>[cm <sup>-1</sup> ] | References |
|------------------------------------------------------------------------------------------------------------------|------------------------------------------|------------------------------------|------------|
| nicotine-1,1'-dium bis(triiodide)-diiodine                                                                       | 2.740                                    | 177                                | [1]        |
| 1-(Iodomethyl)-1,2-dihydro[1,3]thiazolo[3,2-a]quinolin-10-ium tri-iodide hemikis(di-iodine)                      | 2.765                                    | 165                                | [2]        |
| solid iodine                                                                                                     | 2.715                                    | 180                                | [3,4]      |
| (Z)-4-chloro-5-((2-((4-chloro-5H-1,2,3-dithiazol-5-ylidene)amino)phenyl)amino)-1,2,3-dithiazol-1-ium oligoiodide | 2.732                                    | 179                                | [5]        |
| (E)-3-(iodomethylene)-2,3-dihydro-[1,4]oxazino[2,3,4-ij]quinolin-4-ium triiodide diiodine                        | 2.747                                    | 172                                | [6]        |
| 4-benzoyloxy-2,2,6,6-tetramethylpiperidiny-1-oxy tetrakis(diiodine) di(pentaiodide)                              | 2.829                                    | 141                                | [7]        |
| 4-benzoyloxy-2,2,6,6-tetramethylpiperidiny-1-oxy tetrakis(diiodine) di(pentaiodide)                              | 2.813                                    | 156                                | [7]        |
| 5,10,15,20-tetraphenylprophyrinium bis(pentaiodide)                                                              | 2.740                                    | 174                                | [8]        |
| tetraethylammonium bis(diiodine) triiodide                                                                       | 2.734                                    | 178                                | [9,10]     |
| tetramethylammonium pentaiodide                                                                                  | 2.799                                    | 155                                | [10,11]    |
| N-Propylurotropinium heptaiodide                                                                                 | 2.740                                    | 176                                | [12,13]    |
| Tetra(n-propyl)ammonium bis(iodine) triiodide                                                                    | 2.740                                    | 164                                | [14,15]    |
| N-propylurotropinium pentaiodide                                                                                 | 2.780                                    | 163                                | [13,16]    |
| N-propylurotropinium pentaiodide                                                                                 | 2.815                                    | 149                                | [13,16]    |
| bis(N-methylurotropinium) octaiodide                                                                             | 2.773                                    | 164                                | [13,17]    |
| tris(morpholinecarbodithioato-S,S')manganese(IV)pentaiodide–dichloromethane (2/1)                                | 2.810                                    | 144                                | [18]       |
| tris(morpholinecarbodithioato-S,S')manganese(IV)pentaiodide–dichloromethane (2/1)                                | 2.750                                    | 165                                | [18]       |
| morpholinium pentaiodide                                                                                         | 2.783                                    | 164                                | [19,20]    |
| bis(3,5-Di-(N-morpholinio)-1,2,4-trithiolane) hexadecaiodide                                                     | 2.741                                    | 174                                | [20,21]    |
| bis(phenacetinium) pentaiodide                                                                                   | 2.748                                    | 178                                | [22,23]    |
| bis(phthalocyaninato)niobium(IV) octaiodide, 1-chloronaphtalene solvate (3.5/1)                                  | 2.771                                    | 167                                | [24]       |
| bis(N-methylbenzothiazole-2(3H)-selone)-μ-iodonium heptaiodide                                                   | 2.771                                    | 157                                | [25]       |
| bis(N-methylbenzothiazole-2(3H)-selone)-μ-iodonium heptaiodide                                                   | 2.746                                    | 175                                | [25]       |
| cesium octaiodide                                                                                                | 2.762                                    | 170                                | [26,27]    |

|                                                                                                                 |       |     |      |
|-----------------------------------------------------------------------------------------------------------------|-------|-----|------|
| <b>(acetonitrile)-(3,6,9-trithia-1(2,9)-1,10-phenanthrolinecyclodecaphane)-nickel(II) triiodide pentaiodide</b> | 2.784 | 167 | [28] |
| <b>bis(1,4,7-trithiacyclononane)-cobalt(III) tris(tri-iodide) iodine</b>                                        | 2.787 | 168 | [29] |
| <b>bis(1,4,7-trithiacyclononane)-cobalt(III) tris(tri-iodide) iodine</b>                                        | 2.825 | 150 | [29] |
| <b>bis(1,4,7-trithiacyclononane)-nickel(II) bis(pentaiodide)</b>                                                | 2.780 | 164 | [29] |
| <b>bis(1,4,7-trithiacyclononane)-nickel(II) bis(pentaiodide)</b>                                                | 2.815 | 145 | [29] |
| <b>(1,4,8,11-tetrathiacyclotetradecane)-palladium(II) bis(pentaiodide) acetonitrile solvate</b>                 | 2.760 | 168 | [29] |
| <b>(1,4,8,11-tetrathiacyclotetradecane)-palladium(II) bis(pentaiodide) acetonitrile solvate</b>                 | 2.840 | 154 | [29] |
| <b>(1,4,8,11-tetrathiacyclotetradecane)-palladium(II) bis(pentaiodide) acetonitrile solvate</b>                 | 2.798 | 163 | [29] |
| <b>catena-((<math>\mu_2</math>-Iodo)-bis((tetrathia-16-crown-4)-palladium(II)) undecaoidide)</b>                | 2.836 | 149 | [30] |
| <b>catena-((<math>\mu_2</math>-Iodo)-bis((tetrathia-16-crown-4)-platinum(II)) undecaoidide)</b>                 | 2.789 | 158 | [30] |
| <b>catena-((<math>\mu_2</math>-Iodo)-bis((tetrathia-16-crown-4)-platinum(II)) undecaoidide)</b>                 | 2.833 | 153 | [30] |

## Bibliography

- [1] G.J. Reiss, I 5 – polymers with a layered arrangement: synthesis, spectroscopy, and structure of a new polyiodide salt in the nicotine/HI/I 2 system, *Zeitschrift Für Naturforsch. B.* 70 (2015) 735–739. <https://doi.org/10.1515/znb-2015-0092>.
- [2] I.D. Yushina, D.G. Pikhulya, E. V. Bartashevich, The features of iodine loss at high temperatures, *J. Therm. Anal. Calorim.* 139 (2020) 1017–1023. <https://doi.org/10.1007/s10973-019-08442-y>.
- [3] A. Congeduti, M. Nardone, P. Postorino, Polarized Raman spectra of a single crystal of iodine, *Chem. Phys.* 256 (2000) 117–123. [https://doi.org/10.1016/S0301-0104\(00\)00085-9](https://doi.org/10.1016/S0301-0104(00)00085-9).
- [4] P.M. Harris, E. Mack, F.C. Blake, THE ATOMIC ARRANGEMENT IN THE CRYSTAL OF ORTHORHOMBIC IODINE, *J. Am. Chem. Soc.* 50 (1928) 1583–1600. <https://doi.org/10.1021/ja01393a009>.
- [5] O.I. Bol'shakov, I.D. Yushina, E. V Bartashevich, Y. V Nelyubina, R.R. Aysin, O.A. Rakitin, Asymmetric triiodide-diiodine interactions in the crystal of (Z)-4-chloro-5-((2-((4-chloro-5H-1,2,3-dithiazol-5-ylidene)amino)phenyl)amino)-1,2,3-dithiazol-1-ium oligoiodide, *Struct. Chem.* 28 (2017) 1927–1934. <https://doi.org/10.1007/s11224-017-0987-y>.
- [6] I.D. Yushina, B.A. Kolesov, E. V. Bartashevich, Raman spectroscopy study of new thia- and oxazinoquinolinium triiodides, *New J. Chem.* 39 (2015) 6163–6170. <https://doi.org/10.1039/C5NJ00497G>.

- [7] X. Pang, H. Wang, X.R. Zhao, W.J. Jin, Anionic 3D cage networks self-assembled by iodine and V-shaped pentaiodides using dimeric oxoammonium cations produced in situ as templates, *Dalt. Trans.* 42 (2013) 8788–8795. <https://doi.org/10.1039/c3dt50191d>.
- [8] P. Deplano, F.A. Devillanova, J.R. Ferraro, F. Isaia, V. Lippolis, M.L. Mercuri, On the Use of Raman Spectroscopy in the Characterization of Iodine in Charge-Transfer Complexes, *Appl. Spectrosc.* 46 (1992) 1625–1629. <https://doi.org/10.1366/0003702924926880>.
- [9] Y. Wang, Y. Xue, X. Wang, Z. Cui, L. Wang, The stable polyiodides: Experimental and theoretical studies of formation mechanism, *J. Mol. Struct.* 1074 (2014) 231–239. <https://doi.org/10.1016/j.molstruc.2014.05.062>.
- [10] E.M. Nour, L.H. Chen, J. Laane, Far-infrared and Raman spectroscopic studies of polyiodides, *J. Phys. Chem.* 90 (1986) 2841–2846. <https://doi.org/10.1021/j100404a014>.
- [11] M.S. Abdelbassit, O.J. Curnow, M.K. Dixon, M.R. Waterland, The Binary Iodine-Chlorine Octahalide Series  $[I_n Cl_{8-n}]^{2-}$  ( $n=3, 3.6, 4$ ), *Chem. – A Eur. J.* 25 (2019) 11650–11658. <https://doi.org/10.1002/chem.201902135>.
- [12] K.-F. Tebbe, T. Farida, H. Stegemann, H. Füllbier, Untersuchungen an Polyhalogeniden. XXIII. Kristallstrukturen der N-Alkylurotropiniumtriiodide  $UrRI_3$  mit R = Methyl, Ethyl, n-Propyl und n-Butyl, *Zeitschrift für Anorg. Und Allg. Chemie.* 622 (1996) 525–533. <https://doi.org/10.1002/zaac.19966220323>.
- [13] H. Mittag, H. Stegemann, H. Füllbier, G. Irmer, Raman spectroscopic investigation of N-alkylurotropinium polyiodides, *J. Raman Spectrosc.* 20 (1989) 251–255. <https://doi.org/10.1002/jrs.1250200409>.
- [14] K.-F. Tebbe, T. Gilles, Untersuchungen an Polyhalogeniden. XXVII. Über Tetra(n-propyl)ammoniumpolyiodide  $(n-Pr_4N)I_n$  mit  $n = 3, 5, 7$ : Darstellung und strukturelle Charakterisierung eines Triiodids  $(n-Pr_4N)I_3$ , eines Pentaiodids  $(n-Pr_4N)I_5$  und eines Heptaoidids  $(n-Pr_4N)I_7$ , *Zeitschrift für Anorg. Und Allg. Chemie.* 622 (1996) 1587–1593. <https://doi.org/10.1002/zaac.19966220923>.
- [15] F.W. Parrett, N.J. Taylor, Spectroscopic studies on some polyhalide ions, *J. Inorg. Nucl. Chem.* 32 (1970) 2458–2461. [https://doi.org/10.1016/0022-1902\(70\)80541-3](https://doi.org/10.1016/0022-1902(70)80541-3).
- [16] K.-F. Tebbe, K. Nagel, Untersuchungen an Polyhalogeniden. XXVI [1]. Über N-Propylurotropiniumpolyiodide  $UrPr_xI_x$  mit  $x = 5$  und  $7$ : Strukturelle Charakterisierung eines Pentaoidids und eines Heptaoidids, *Zeitschrift für Anorg. Und Allg. Chemie.* 622 (1996) 1323–1328. <https://doi.org/10.1002/zaac.19966220809>.
- [17] A. Gräfe-Kavoosian, S. Nafepour, K. Nagel, K.-F. Tebbe, On the Octaoidide Ion  $I_8^{2-}$ : Preparation and Crystal Structure of  $[(Crypt-2.2.2)H_2]I_8$ , of  $[Ni(phen)_3]I_8 \cdot 2CHCl_3$  and of the Bis(Nalkylurotropinium)octaoidides  $(UrR)_2I_8$  with R = methyl and ethyl, *Z. Naturforsch.* 53b (1998) 641–652.
- [18] P. Deplano, E.F. Trogu, F. Bigoli, M.A. Pellinghelli, Synthesis and crystal structure of tris(morpholinecarbodithioato-S,S')manganese(IV) pentaoidide–dichloromethane (2/1), *J. Chem. Soc., Dalt. Trans.* (1987) 2407–2410. <https://doi.org/10.1039/DT9870002407>.
- [19] CSD entry: WAHZIO, (n.d.).



- [20] P. Deplano, F.A. Devillanova, J.R. Ferraro, M.L. Mercuri, V. Lippolis, E.F. Trogu, FT-Raman study on charge-transfer polyiodide complexes and comparison with resonance Raman results, *Appl. Spectrosc.* 48 (1994) 1236–1241. <https://doi.org/10.1366/0003702944027372>.
- [21] F. Bigoli, M.A. Pellinghelli, G. Crisponi, P. Deplano, E.F. Trogu, Reaction of bis(morpholiniothiocarbonyl) disulphide with iodine. Existence of a 1 : 1 charge-transfer precursory adduct in an oxidation reaction. Isolation and crystal structure of bis[3,5-di(N-morpholinio)-1,2,4-trithiolane] hexadecaoidide, *J. Chem. Soc. Dalt. Trans.* (1985) 1349. <https://doi.org/10.1039/dt9850001349>.
- [22] F.H. Herbstein, M. Kapon, The crystal structures of the polyiodide salts (phenacetin) 2 HI 5 and (theobromine) 2 H 2 I 8, *Philos. Trans. R. Soc. London. Ser. A, Math. Phys. Sci.* 291 (1979) 199–218. <https://doi.org/10.1098/rsta.1979.0021>.
- [23] P. Deplano, J.R. Ferraro, M.L. Mercuri, E.F. Trogu, Structural and Raman spectroscopic studies as complementary tools in elucidating the nature of the bonding in polyiodides and in donor-I<sub>2</sub> adducts, *Coord. Chem. Rev.* 188 (1999) 71–95. [https://doi.org/10.1016/S0010-8545\(98\)00238-0](https://doi.org/10.1016/S0010-8545(98)00238-0).
- [24] M.P. Donzello, C. Ercolani, A. Chiesi-Villa, C. Rizzoli, One Step Forward to “Stapled” Bis(phthalocyanine) Metal Complexes: Synthesis, Characterization, and Redox Properties of Bis(phthalocyaninato)niobium(IV). X-ray Crystal Structure of the Monoelectronically Oxidized Species [Pc<sub>2</sub>Nb](I<sub>3</sub>)(I<sub>2</sub>)<sub>0.5</sub> (CINP)<sub>3</sub>, *Inorg. Chem.* 37 (1998) 1347–1351. <https://doi.org/10.1021/ic970841f>.
- [25] F. Demartin, P. Deplano, F.A. Devillanova, F. Isaia, V. Lippolis, G. Verani, Conductivity, FT-Raman spectra, and x-ray crystal structures of two novel [D<sub>2</sub>I]<sub>n</sub> (n = 3 and D = N-methylbenzothiazole-2(3H)-selone; n = 7 and D = N-methylbenzothiazole-2(3H)-thione) iodonium salts. First example of I<sub>3</sub>I<sub>2</sub> heptaoidide, *Inorg. Chem.* 32 (1993) 3694–3699. <https://doi.org/10.1021/ic00069a025>.
- [26] K.I. K Odagi, H Nakayama, Behavior of I<sub>2</sub> and I<sub>3</sub><sup>-</sup> Molecular Units Near the Crystal Surface of CsI and Related Polyiodides. Raman-Spectroscopic Studies, *Bull. Chem. Soc. Jpn.* 63 (1990) 3277–3281.
- [27] E.E. Havinga, K.H. Boswijk, E.H. Wiebenga, The crystal structure of Cs<sub>2</sub>I<sub>8</sub>(CsI<sub>4</sub>), *Acta Crystallogr.* 7 (1954) 487–490. <https://doi.org/10.1107/S0365110X54001545>.
- [28] M. Carla Aragoni, M. Arca, F. Demartin, F.A. Devillanova, A. Garau, F. Isaia, V. Lippolis, S. Rizzato, G. Verani, [Ni(L)(MeCN)]<sub>2</sub>+complex cation as a template for the assembly of extended I<sub>3</sub><sup>-</sup>–I<sub>5</sub><sup>-</sup> and I<sub>5</sub><sup>-</sup>–I<sub>7</sub><sup>-</sup> polyiodide networks {L=2,5,8-trithia[9](2,9)-1,10-phenanthroline}. Synthesis and structures of [Ni(L)(MeCN)]<sub>18</sub> and [Ni(L)(MeCN)]<sub>12</sub>, *Inorganica Chim. Acta.* 357 (2004) 3803–3809. <https://doi.org/10.1016/j.ica.2004.05.027>.
- [29] A.J. Blake, W.S. Li, V. Lippolis, S. Parsons, M. Schröder, Extended structures of polyiodide salts of transition metal macrocyclic complexes, *Acta Crystallogr. Sect. B Struct. Sci.* (2007). <https://doi.org/10.1107/S0108768106041668>.
- [30] A.J. Blake, R.O. Gould, W. Li, V. Lippolis, S. Parsons, M. Schröder, Thioether crown complexes as templates for the assembly of extended polyiodide networks: synthesis and structures of {[M([16]aneS<sub>4</sub>)]<sub>2</sub>I}<sub>11</sub> (M = Pd, Pt), [Pd(cis-HO)<sub>2</sub>[14]aneS<sub>4</sub>](I<sub>3</sub>)<sub>2</sub>, [Pd([9]aneS<sub>3</sub>)<sub>2</sub>](I<sub>x</sub>)<sub>2</sub> (x = 3, 5), *Cryst. Eng.* 2 (1999) 153–170. [https://doi.org/10.1016/S1463-0184\(99\)00016-7](https://doi.org/10.1016/S1463-0184(99)00016-7).
